# Supplementary material
Source: publisher figshare collection journal article supplement (https://acs.figshare.com/ndownloader/files/4623400)
Supplement: Supplementary file 1 [file 4623400]

## **Supporting Information**

### **Crystal plane dependent growth of aligned single-walled carbon nanotubes on sapphire**

Naoki Ishigami, Hiroki Ago,\* Kenta Imamoto, Masaharu Tsuji,  
Konstantin Iakoubovskii, and Nobutsugu Minami

Graduate School of Engineering Sciences, Institute for Materials Chemistry and Engineering,  
Kyushu University, Japan  
PRESTO, Japan Science and Technology Agency (JST), Japan  
Nanotechnology Research Institute, National Institute of Advanced Industrial Science and  
Technology (AIST), Japan

#### **Complete Ref. 31**

Hofmann, S.; Sharma, R.; Ducati, C.; Du, G.; Mattevi, C.; Cepcek, C.; Cantoro, M.; Pisana, S.; Parvez, A.; Cervantes-Sodi, F.; Ferrari, A. C.; Dunin-Borkowski, R.; Lizzit, S.; Petaccia, L.; Goldoni, A.; Robertson, J. *Nano Lett.* 2007, 7, 602.

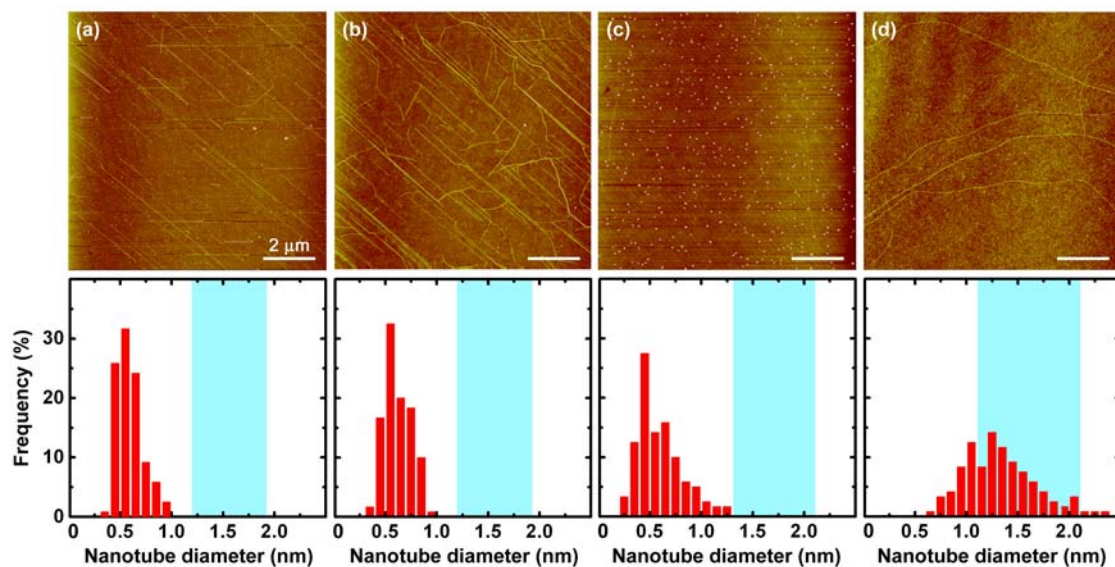

**Figure S-1.** AFM images and height distributions of SWNTs grown at 900 °C on sapphire A-plane (a), R-plane (b), C-plane (c), and SiO<sub>2</sub>/Si (d) substrates. The total number of counted nanotubes is 120. The hatched area shows the diameter distribution obtained from the RBM signals of the Raman spectra (Fig. 4). Comparison of the AFM, Raman, and PL (Fig. 8) data suggests that AFM does underestimate the nanotube diameter, presumably because of the process-induced substrate inhomogeneities. In particular, the carbon deposition could bury the SWNTs thus effectively reducing the AFM diameters for the sapphire substrates. However, the qualitative trends regarding the width and position of the diameter distribution could be assessed.

A-plane

(15, 1)

SWNT growth  
direction

[0 0 0 1]

[1  $\bar{1}$  0 0]

**Figure S-2 (a).** Atomic model of A-plane sapphire (red: Al, blue: O) and graphene network expanded from (15, 1) SWNT (white).

A-plane

(9, 8)

SWNT growth  
direction

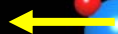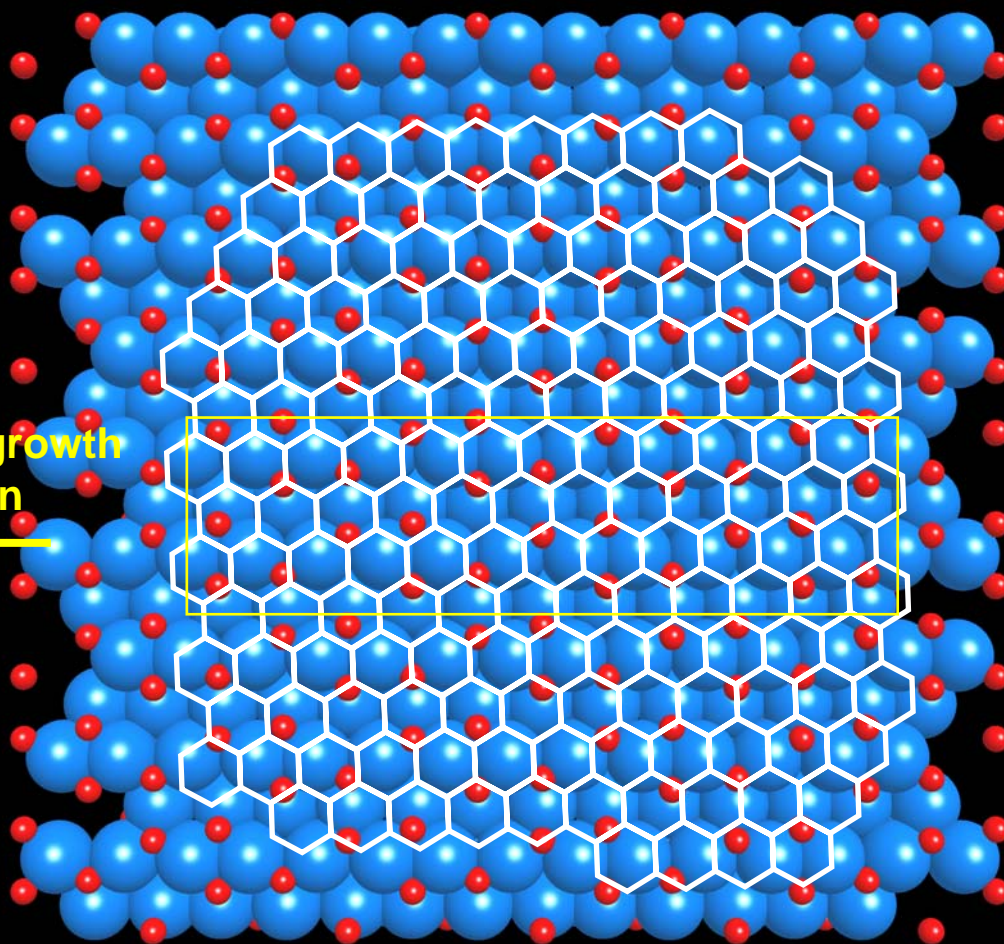

$[0001]$

$[1\bar{1}00]$

**Figure S-2 (b).** Atomic model of A-plane sapphire (red: Al, blue: O) and graphene network expanded from (9, 8) SWNT (white).



R-plane

(15, 1)

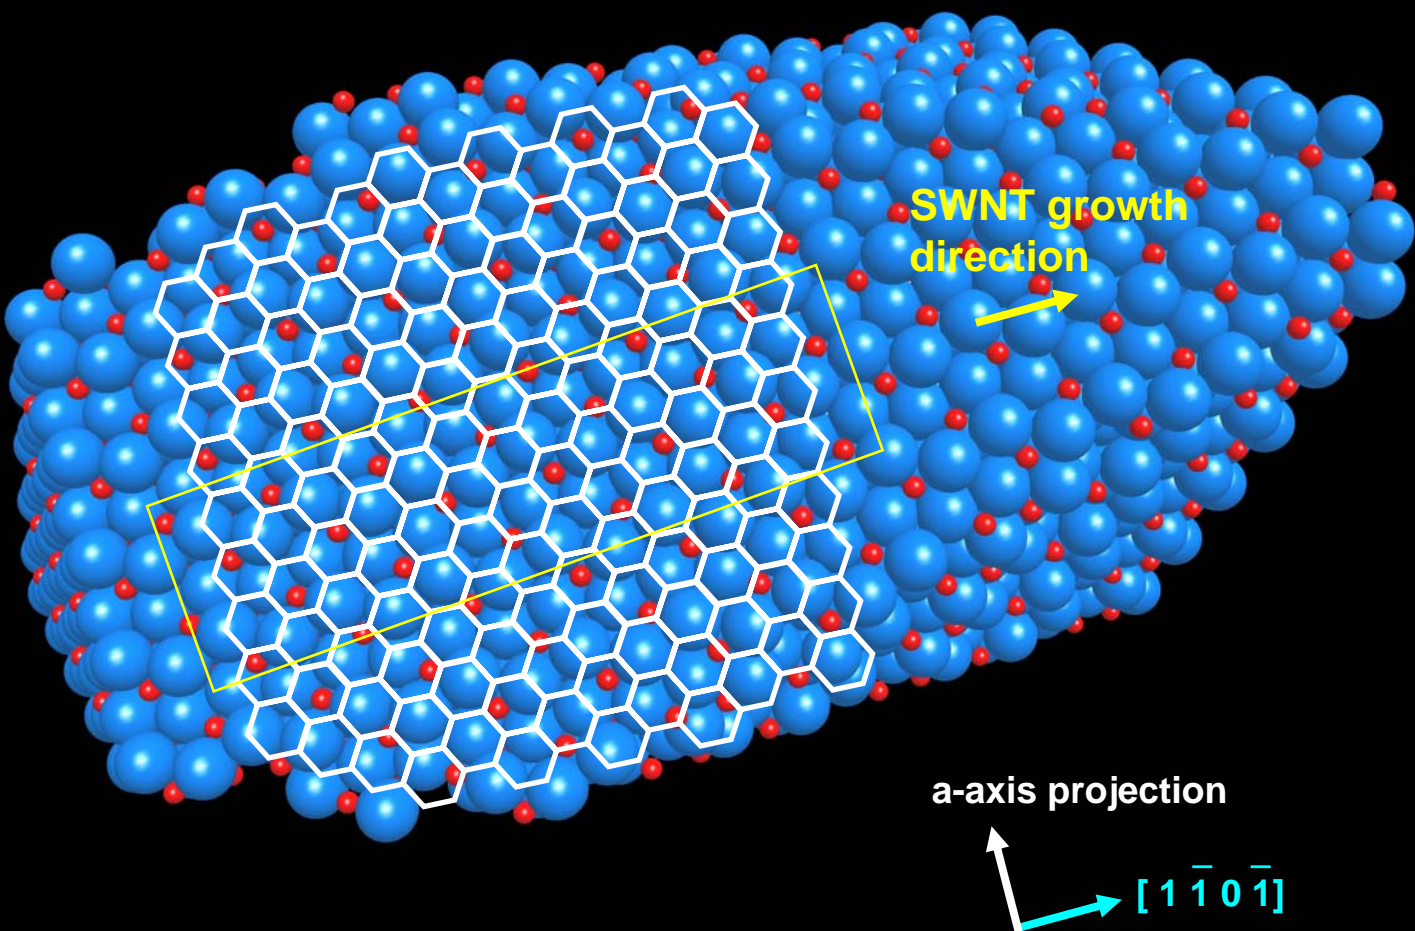

**Figure S-2 (c).** Atomic model of R-plane sapphire (red: Al, blue: O) and graphene network expanded from (15, 1) SWNT (white).

R-plane

(9, 8)

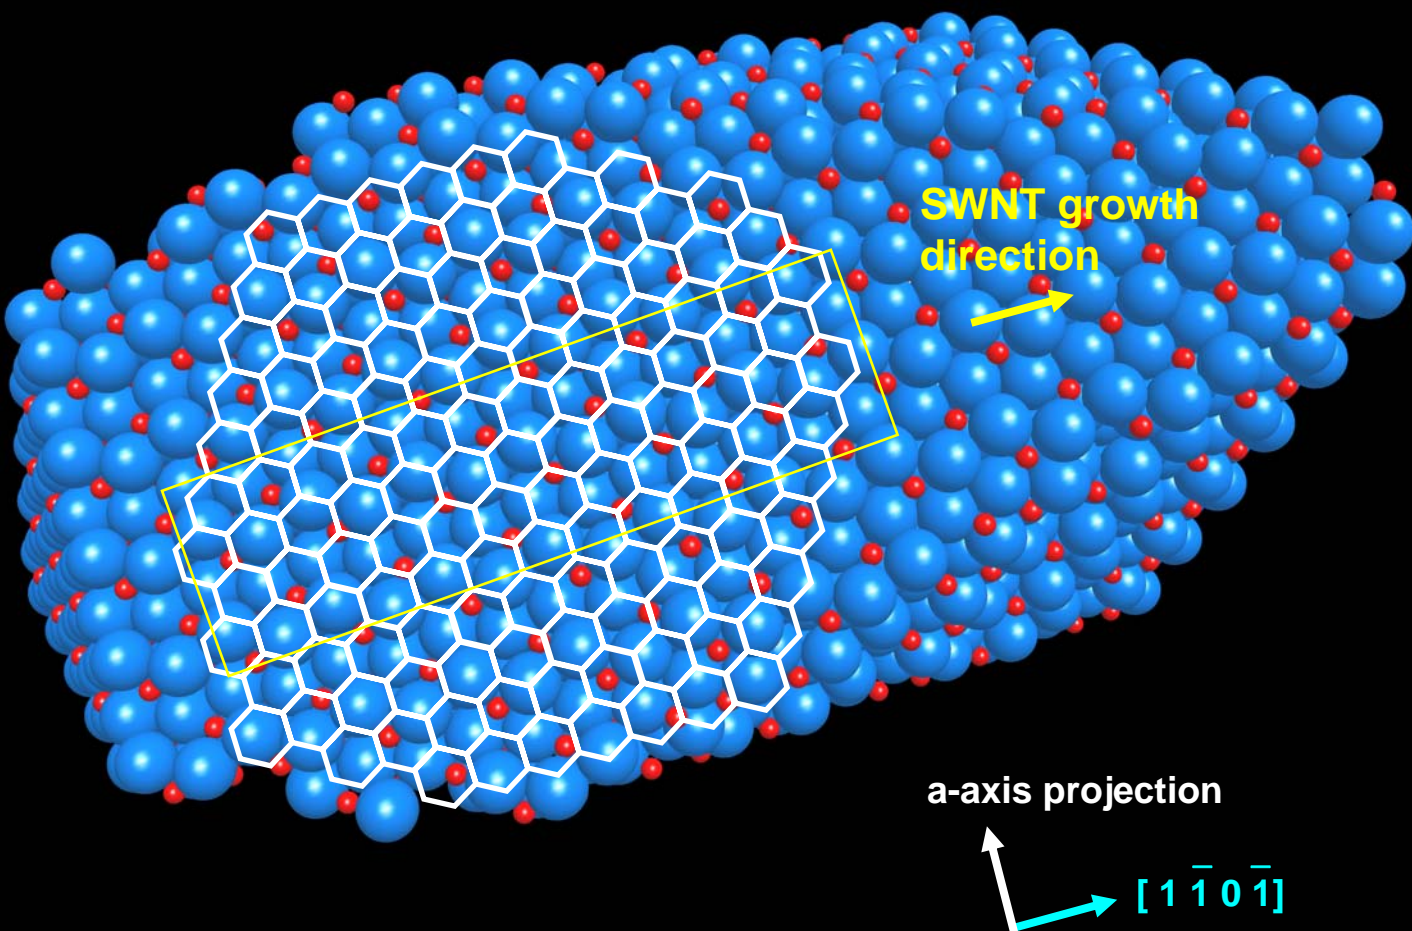

**Figure S-2 (d).** Atomic model of R-plane sapphire (red: Al, blue: O) and graphene network expanded from (9, 8) SWNT (white).
